# Supplementary material for: Murine SEC24D can substitute functionally for SEC24C during embryonic development
Source: PubMed Central journal article supplement (PMC8548507; doi:10.1038/s41598-021-00579-x), 2021-10-26

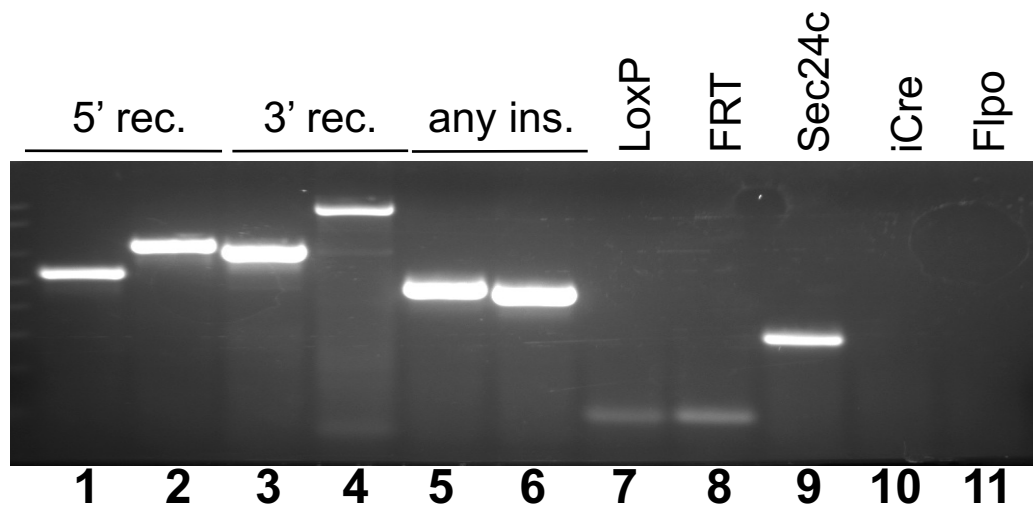

Figure 1C uncropped image (with 1Kb+ ladder)

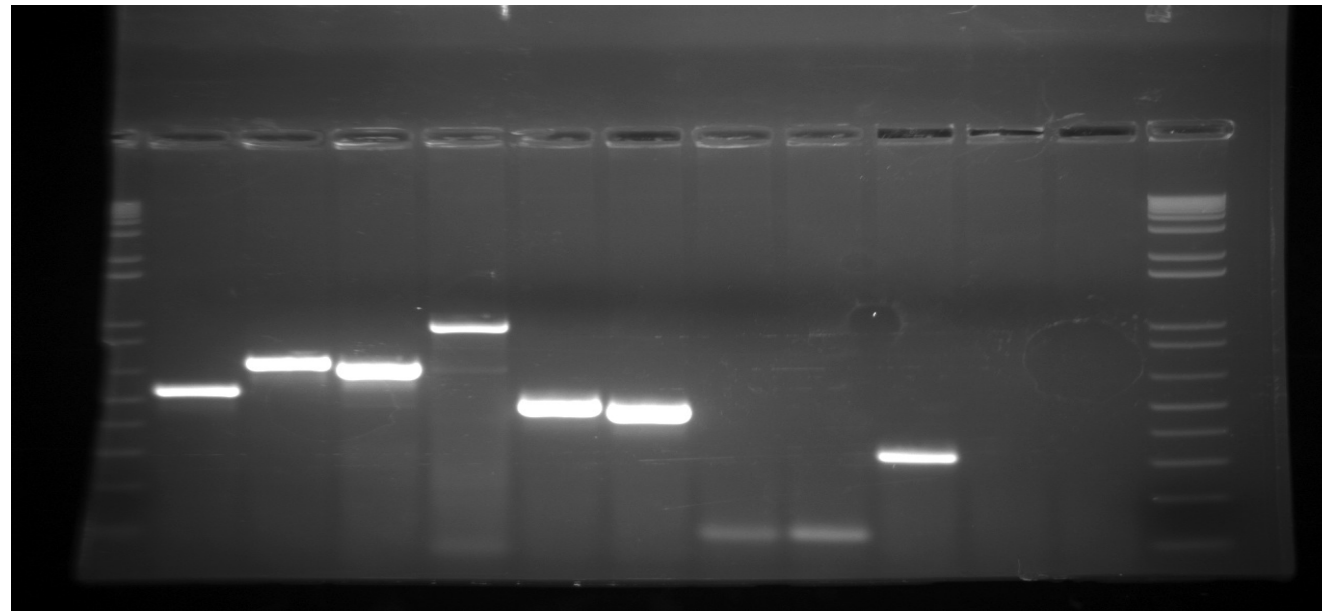

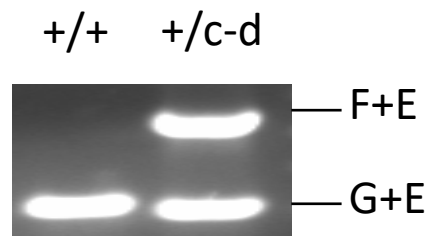

Figure 1D uncropped image (with 1Kb+ ladder)

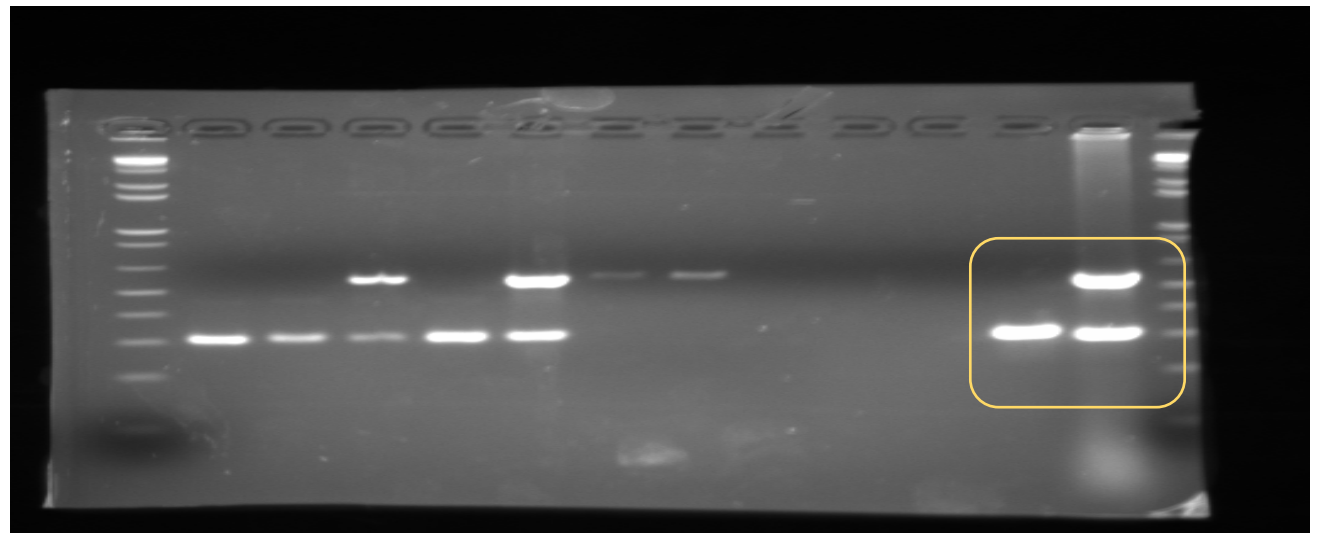

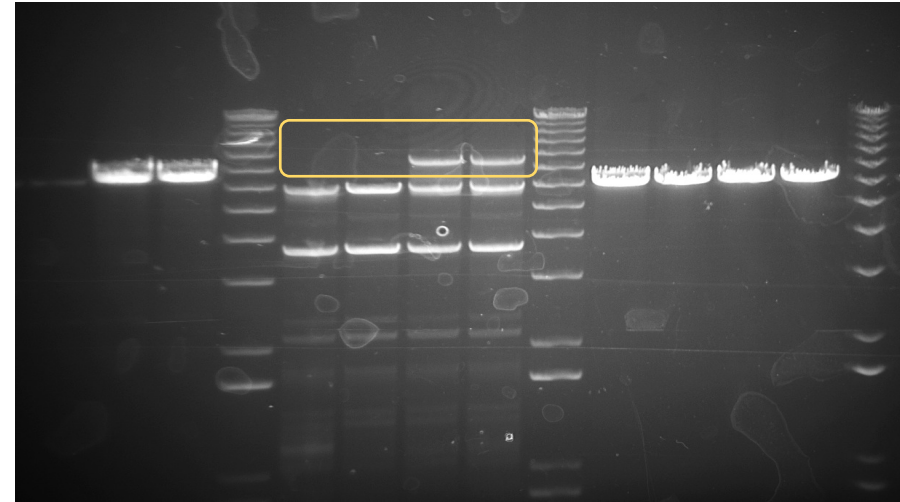

Figure 1E uncropped images (with 1Kb+ ladder)

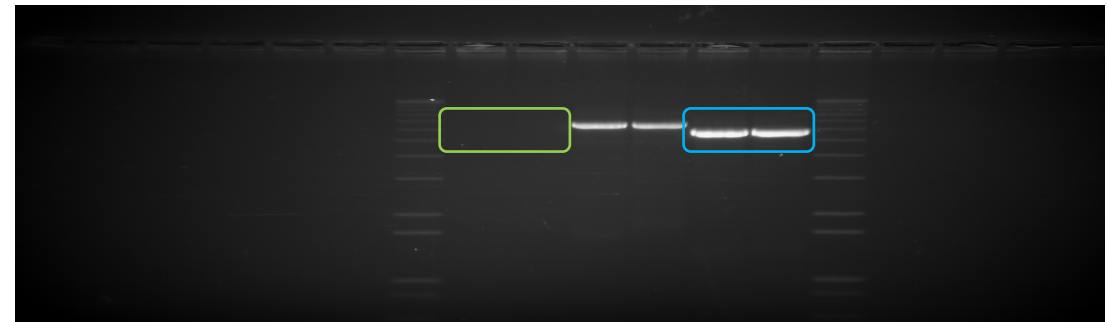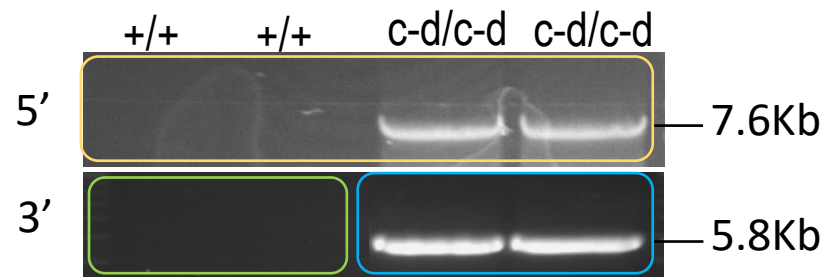

**FIGURE 5**

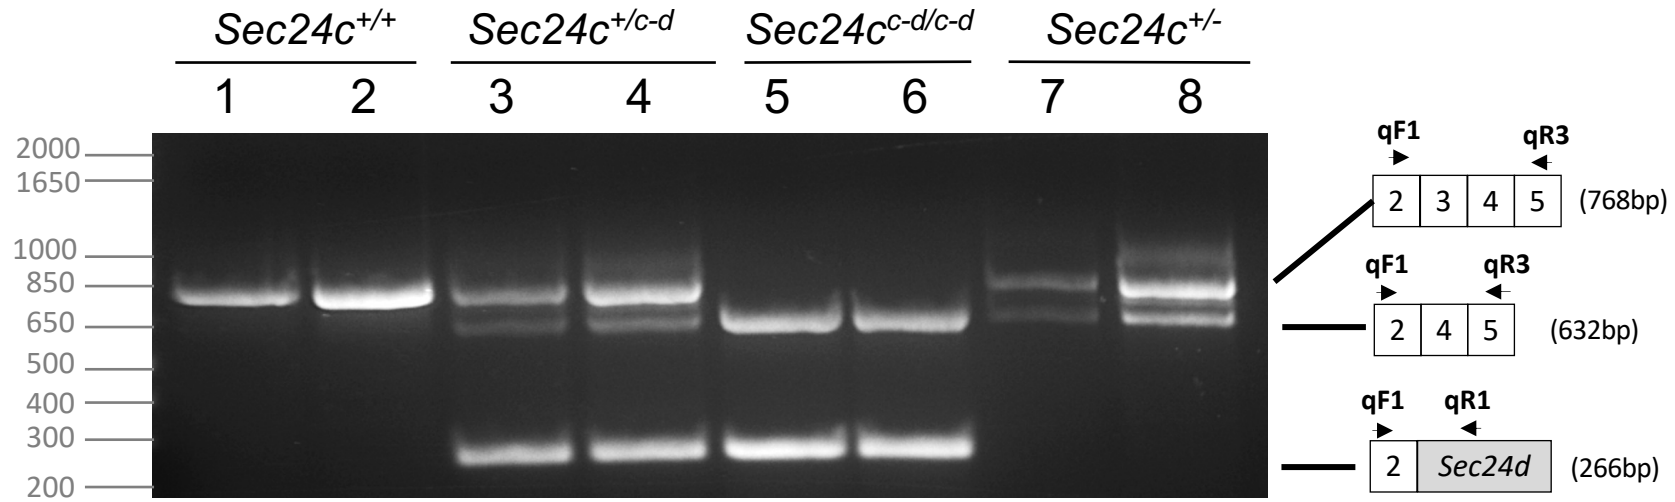

Figure 5 uncropped images (with 1Kb+ ladder)

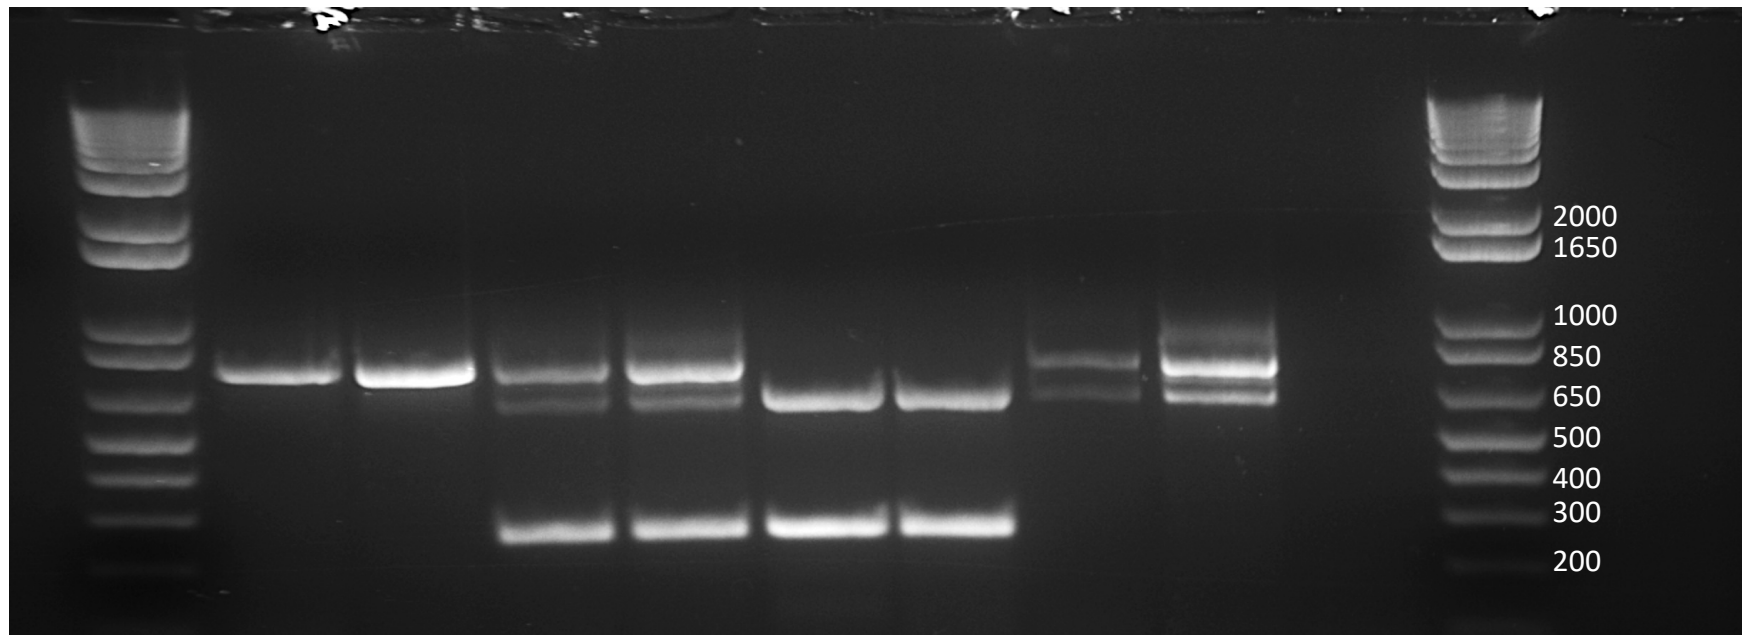

Supplement: 41598_2021_579_MOESM2_ESM.pdf [file 41598_2021_579_MOESM2_ESM.pdf]
